# Supplementary material for: A method for the inference of cytokine interaction networks
Source: PubMed Central journal article supplement (PMC9216621; doi:10.1371/journal.pcbi.1010112), 2022-06-22
Supplement: pcbi.1010112.s001.pdf [file pcbi.1010112.s001.pdf]

# A method for the inference of cytokine interaction networks

## Supporting information

J.E. Jansen, D. Aschenbrenner, H.H. Uhlig, M.C. Coles and E.A. Gaffney

### S1 Appendix: Experimental methods

All experimental data presented in this paper have been published before in [1], from which the following section was taken. Healthy donors were recruited via the Oxford gastrointestinal biobank (11/YH/0020 and 16/YH/0247). All healthy volunteers provided written informed consent. Whole blood was collected into EDTA-containing tubes. PBMC were purified using FicollPaque density gradient purification. The absolute number of cells was determined using a haemocytometer (Marienfeld). For the assays,  $0.5 \times 10^6$  -  $1 \times 10^6$  PBMC were cultured in 200  $\mu$ l medium in duplicates in round bottom 96-well plates and exposed to ultrapure 200 ng/ml LPS (Enzo Life Sciences; Cat. # ALX-581-008) for 16 hours in complete RPMI with L-glutamine (Sigma) supplemented with 10 % human serum (Sigma; Cat.# H4522), non-essential amino acids (Gibco); 1 mM Sodium-Pyruvate (Gibco) and 100 U/ml penicillin and 10  $\mu$ g/ml streptomycin (Sigma). The following neutralizing antibodies or receptor blocking antibodies were used (all 10  $\mu$ g/ml): anti-IL-10R (Biolegend;clone: 3F9), anti-IL-1R1 (R&D; Cat.# AF269; polyclonal Goat IgG), anti-IL-1a/IL-1F1 (R&D; Cat.# AF-200-NA; polyclonal Goat IgG), anti-IL-1b/IL-1F2 (R&D; Cat.# MAB201; clone: 8516), anti-IL-6R (Tocilizumab, ActemraÒ, Roche), antiTNFa (Infliximab, REMICADEÒ, Janssen), anti-IL-10R (Biolegend; Cat.# 308807; clone: 3F9). Cells were stimulated in the presence of brefeldin A (BFA, 10  $\mu$ g/ml, all from Sigma) for the final 4 hours of cell culture. Cells were fixed and permeabilised with Cytofix/Cytoperm (BD Biosciences) according to the manufacturer's instructions. To exclude dead cells from the analysis, cells were stained prior to fixation using Fixable Viability Dye eFluor 780 (eBioscience). Following fluorophore-conjugated anti-cytokine antibodies were used for analysis (supplier; clone): anti-IL-1a (Biolegend; 364-3B3-14), anti-IL-1b (Biolegend; H1b98), anti-IL-6 (eBioscience; MQ2-13A5), anti-IL-10 (Biolegend; JES3-9D7), anti-IL-23p19 (eBioscience; 23dcdp), anti-TNF (Biolegend: MAb11). For the detection of IL-12p40 the combination of biotin-conjugated anti-IL-12p40 (BD Biosciences; C8.6) and streptavidin STV-CF594 (BD Biosciences; Cat.# 562318) were used. Data were acquired on a LSRII flow cytometer (BD Biosciences).

### References

1. Aschenbrenner D, Quaranta M, Banerjee S, Ilott N, Jansen J, Steere B, et al. Deconvolution of monocyte responses in inflammatory bowel disease reveals an IL-1 cytokine network that regulates IL-23 in genetic and acquired IL-10 resistance. Gut. 2020;(Web). doi:10.1136/gutjnl-2020-321731.
